# Supplementary material for: Efficacy of the Sentinox Spray in Reducing Viral Load in Mild COVID-19 and Its Virucidal Activity against Other Respiratory Viruses: Results of a Randomized Controlled Trial and an In Vitro Study
Source: MDPI journal article supplement (doi:10.3390/v14051033), 2022-05-12
Supplement: s1 [file s1]

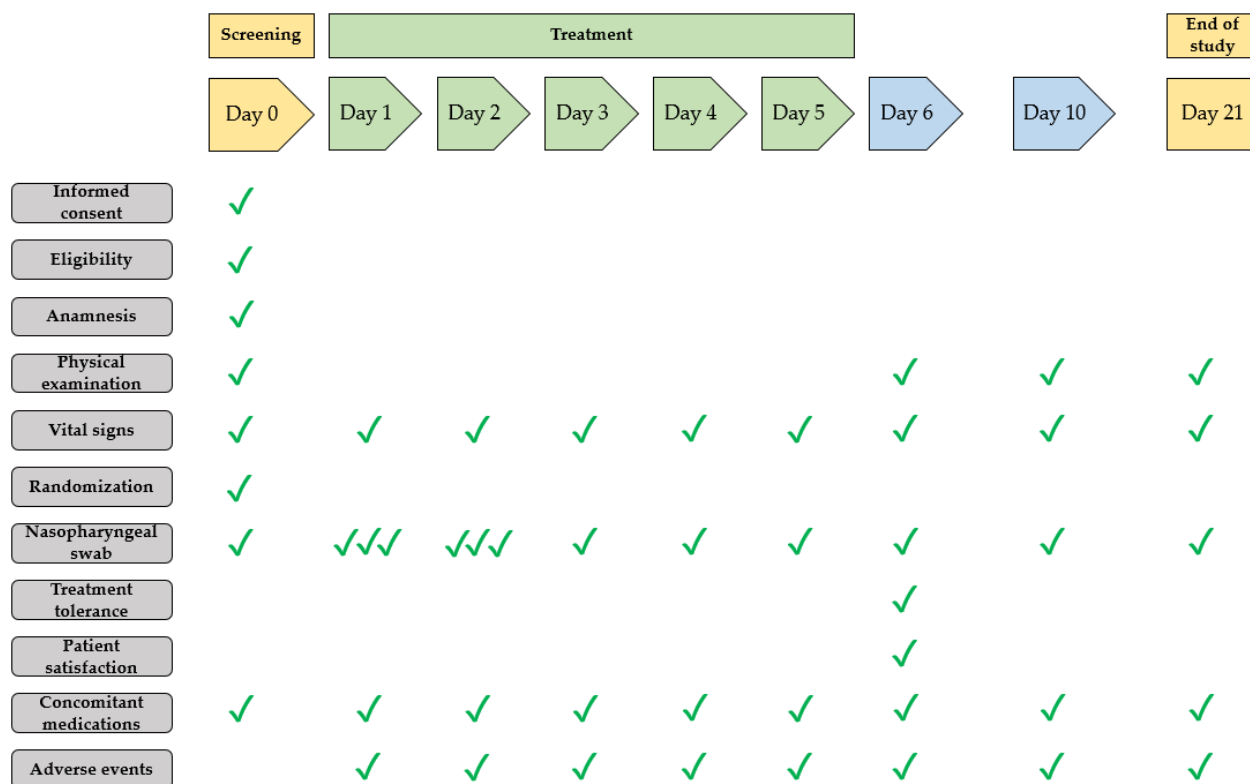

Figure S1. Overview of the study procedures.

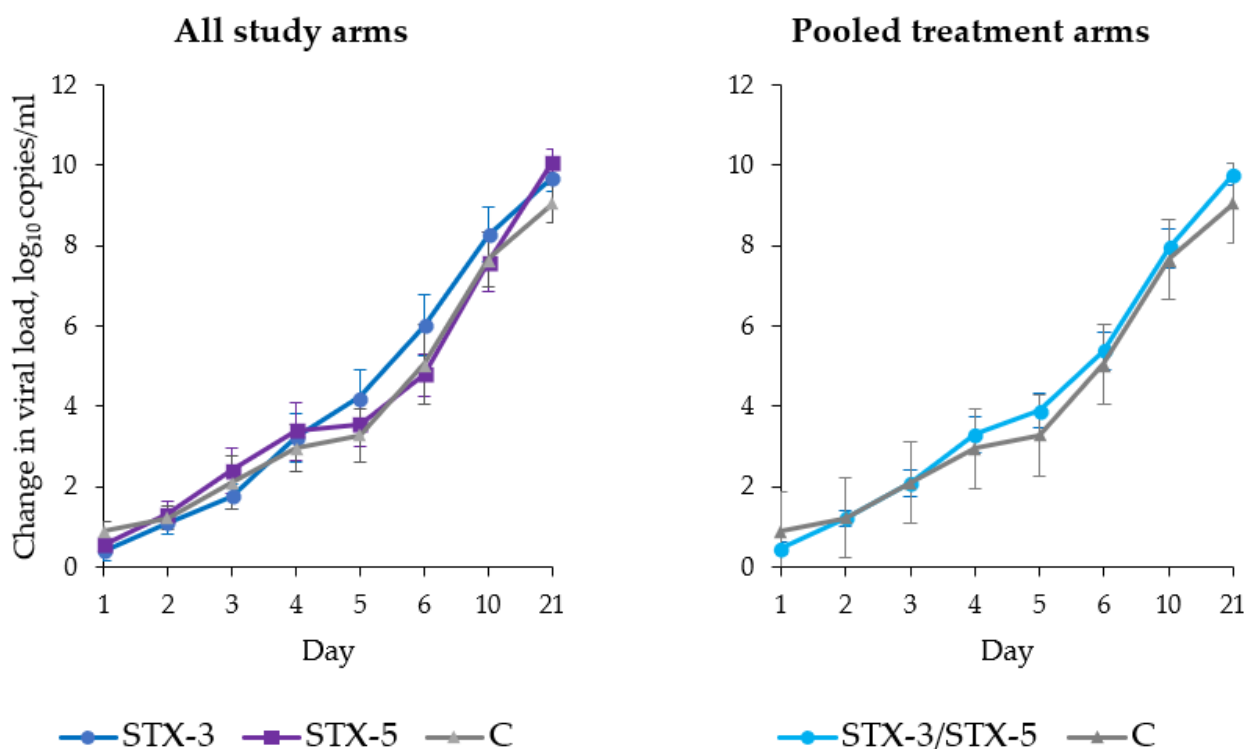

Figure S2. Absolute change in viral loads in the per-protocol population ( $n = 49$ ), by study arm and day of follow-up (vertical bars represent standard errors).

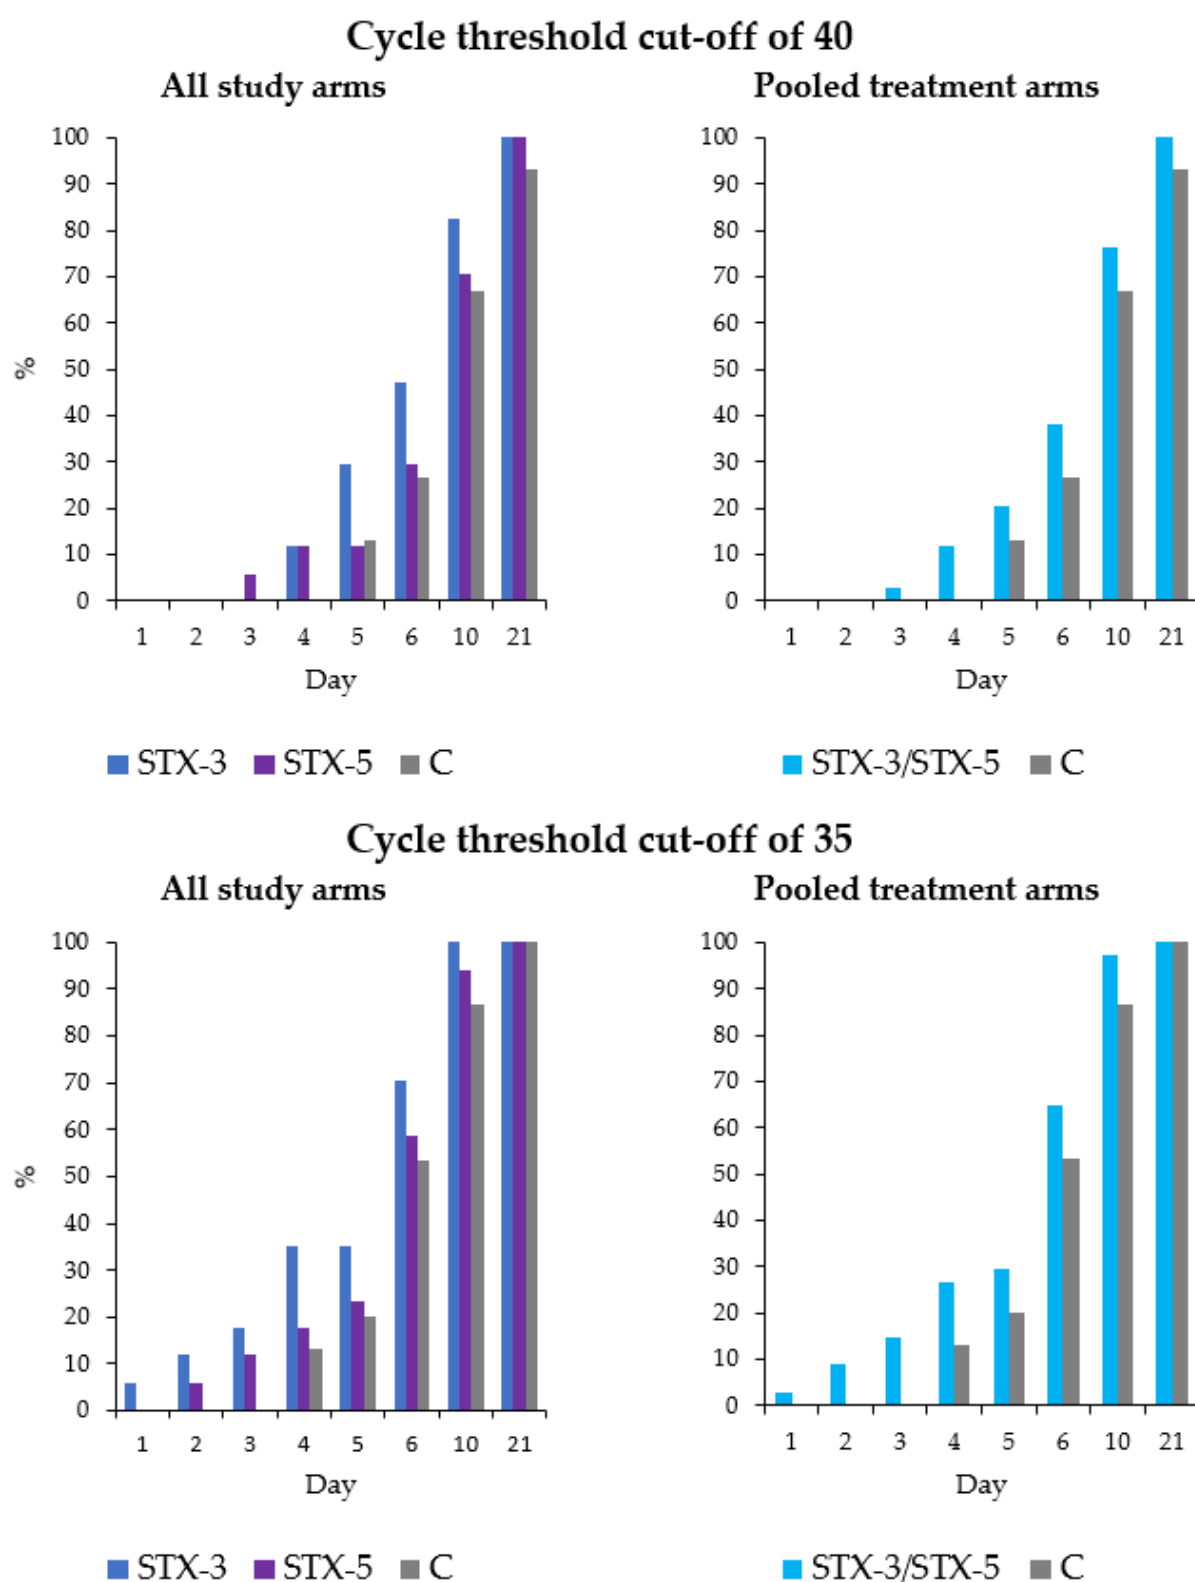

**Figure S3.** Proportion of negativized subjects in the per-protocol analysis, by negativization definition, study arm and day of follow-up.

**Table S1.** Test media used in the study, by virus.

| <b>Virus</b>            | <b>Medium Components</b>                                                                                                                                                                                 |
|-------------------------|----------------------------------------------------------------------------------------------------------------------------------------------------------------------------------------------------------|
| Influenza virus A(H1N1) | Dulbecco's modified eagle medium (DMEM) supplemented with 2 µg/ml TPCK-trypsin, 100 units/ml penicillin, 10 µg/ml gentamicin, 2.5 µg/ml amphotericin B                                                   |
| Influenza virus B       | Dulbecco's modified eagle medium (DMEM) supplemented with 2 µg/ml TPCK-trypsin, 100 units/ml penicillin, 10 µg/ml gentamicin, 2.5 µg/ml amphotericin B                                                   |
| RSV A                   | Dulbecco's modified eagle medium (DMEM) supplemented with 2% (v/v) heat-inactivated fetal bovine serum (FBS), 1.0 mM L-glutamine, 100 units/ml penicillin, 10 µg/ml gentamicin, 2.5 µg/ml amphotericin B |
| Rhinovirus              | Minimal essential medium (MEM) supplemented with 10% (v/v) heat-inactivated fetal bovine serum (FBS), 100 units/ml penicillin, 10 µg/ml gentamicin, 2.5 µg/ml amphotericin B                             |
| Adenovirus 5            | Minimal essential medium (MEM) supplemented with 5% (v/v) heat-inactivated fetal bovine serum (FBS), 100 units/ml penicillin, 10 µg/ml gentamicin, 2.5 µg/ml amphotericin B                              |
| Parainfluenza virus 3   | Minimal essential medium (MEM) supplemented with 1% (v/v) heat-inactivated fetal bovine serum (FBS), 100 units/ml penicillin, 10 µg/ml gentamicin, 2.5 µg/ml amphotericin B                              |
| Coronavirus 229E        | Minimal essential medium (MEM) supplemented with 2% (v/v) heat-inactivated fetal bovine serum (FBS), 100 units/ml penicillin, 10 µg/ml gentamicin, 2.5 µg/ml amphotericin B                              |
